# Supplementary material for: Biomass components toward H 2 and value-added products by sunlight-driven photocatalysis with electronically integrated Au δ − –TiO 2 : concurrent utilization of electrons and holes
Source: Royal Society of Chemistry journal article supplement (doi:10.1039/d2su00145d), 2023-01-01
Supplement: d2su00145d1.pdf [file d2su00145d1.pdf]

## Biomass Components to H<sub>2</sub> and Value Added Products by Sunlight Driven Photocatalysis with Electronically Integrated Au<sup>δ-</sup>-TiO<sub>2</sub>: Concurrent Utilisation of Electrons and Holes

Himanshu Bajpai,<sup>a,b</sup> Inderjeet Chauhan,<sup>a,b</sup> Kranti Salgaonkar,<sup>a,b</sup> Nitin B. Mhamane<sup>a,b</sup> and Chinnakonda S. Gopinath<sup>a,b,\*</sup>

<sup>a</sup>Catalysis and Inorganic Chemistry Division, CSIR - National Chemical Laboratory, Dr. Homi Bhabha Road, Pune 411 008, India.

<sup>b</sup>Academy of Scientific and Innovative Research (AcSIR), Ghaziabad 201 002, India.

E-mail: cs.gopinath@ncl.res.in

### Electronic Supplementary Information (ESI)

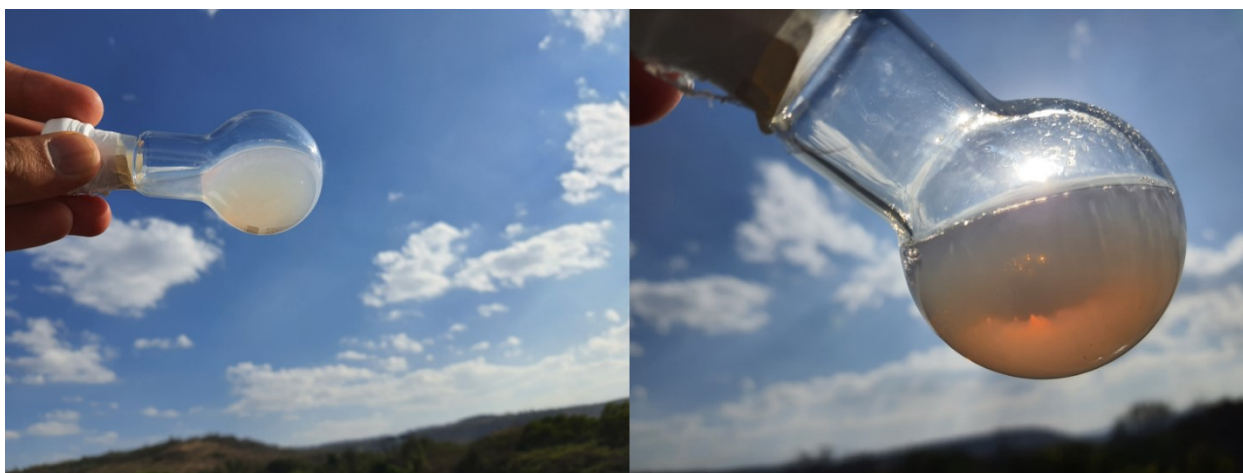

**Figure S1:** Digital photographs to show an uniform dispersion of the catalyst during reaction under direct sunlight.

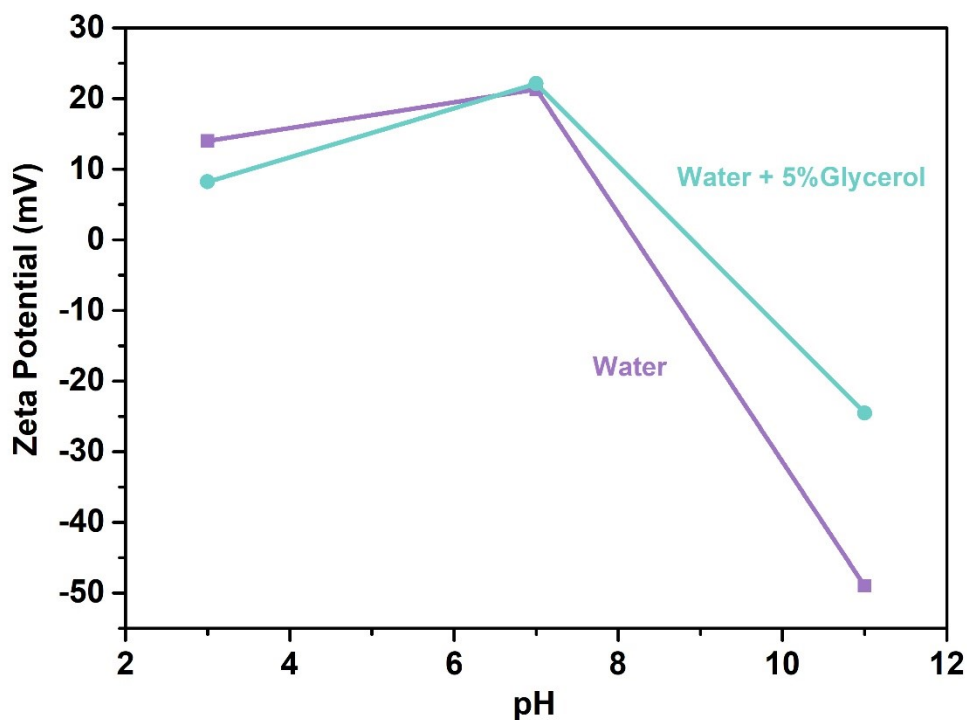

**Figure S2:** Zeta potential of 0.5Au@TiO<sub>2</sub> in water and water +glycerol solution at different pH. Zeta potential at acidic pH is closer to zero compared to neutral, which is more positive and also in agreement with the high photocatalytic activity reported in the main manuscript at neutral pH, than acidic or basic pH. Highly hydroxylated surface under basic conditions makes the zeta potential to be highly negative.

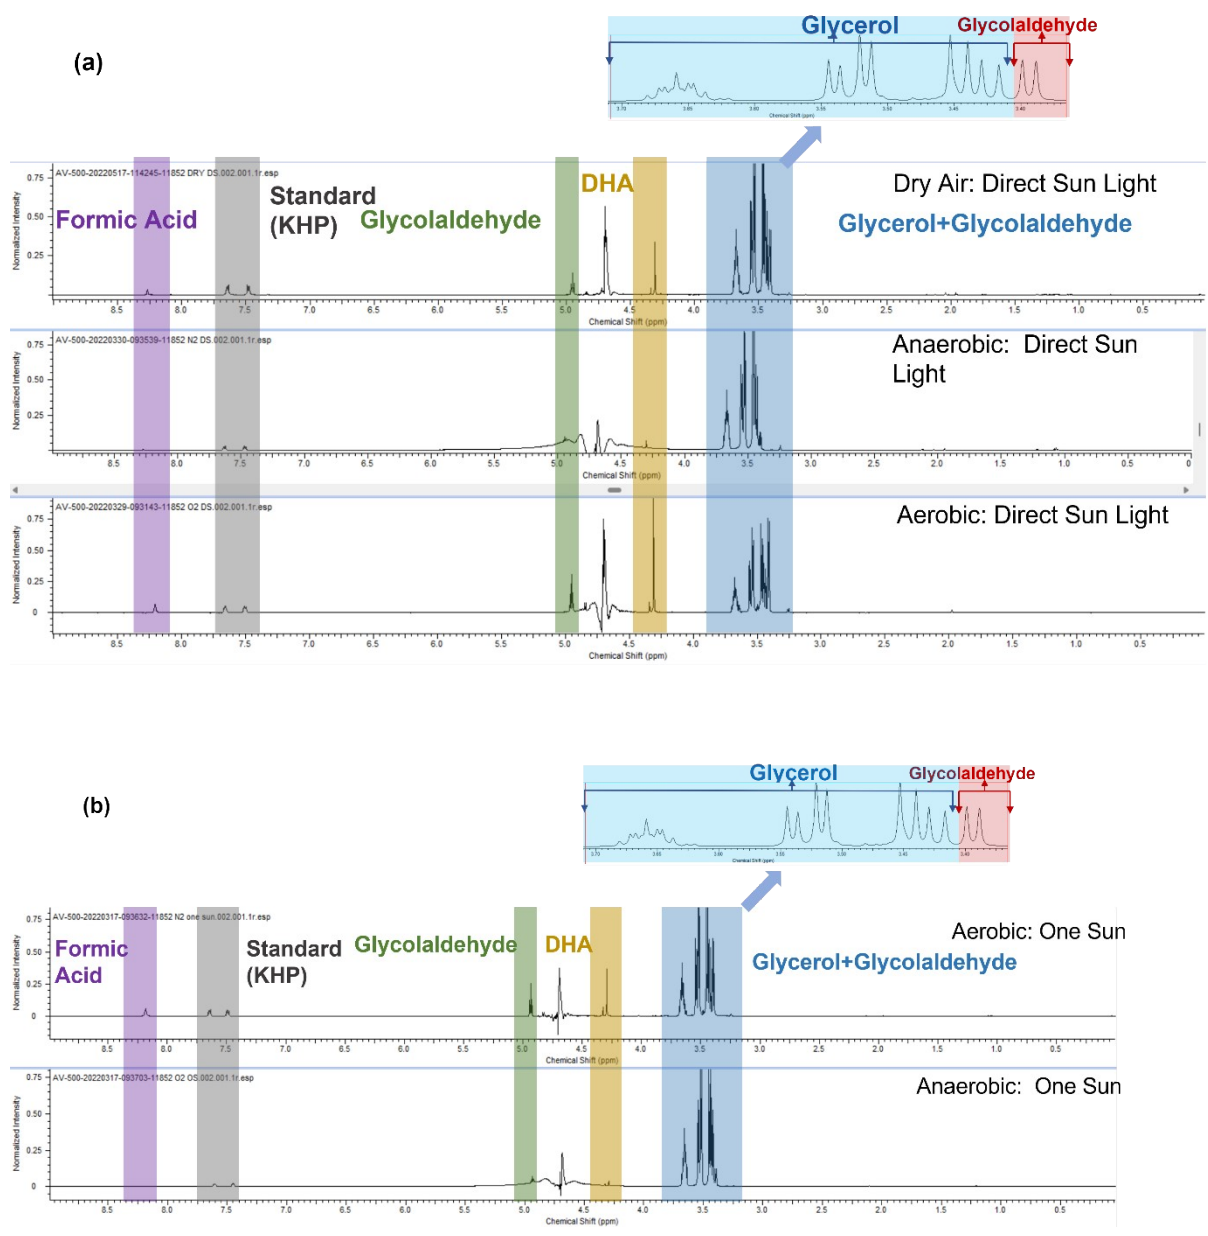

**Figure S3:** NMR spectra of the glycerol oxidation, a) With different condition under direct sunlight, b) under one sun. conditions: 5 mg catalyst in 5 ml glycerol solution, 5h reaction

**Table S4:** Product analysis of glycerol oxidation in **anaerobic** condition.

| Product          | Concentration (M/g. 5h) | Yield (mmol/g.5h) | Selectivity (%)# | Selectivity with respect to no of Carbon (%) | Conversion (%) | TON (Au loading) | TOF (Au loading)/h |
|------------------|-------------------------|-------------------|------------------|----------------------------------------------|----------------|------------------|--------------------|
| Glycolaldehyde   | 0.32                    | 1.6               | 52               | 54                                           | 6              | 64               | 12.8               |
| Dihydroxyacetone | 0.12                    | 0.6               | 20               | 31                                           |                | 24               | 4.8                |
| Formic Acid      | 0.17                    | 0.85              | 28               | 15                                           |                | 34               | 6.8                |
| CO <sub>2</sub>  | ND                      | ND                | ND               | ND                                           |                | ND               | ND                 |
| H <sub>2</sub>   | NA                      | 32 mmol/g.        | NA               | NA                                           |                | 1280             | 256                |

#: Selectivity among the organic products

**Table S5:** Product analysis of glycerol oxidation in **aerobic** condition.

| Product          | Concentration (M/g. 5h) | Yield (mmol/g.5h) | Selectivity (%)# | Selectivity with respect to no of Carbon (%) | Conversion (%) | TON (Au loading) | TOF (Au loading)/h |
|------------------|-------------------------|-------------------|------------------|----------------------------------------------|----------------|------------------|--------------------|
| Glycolaldehyde   | 0.56                    | 2.82              | 20               | 29                                           | 13             | 112.8            | 22.56              |
| Dihydroxyacetone | 0.34                    | 1.7               | 13               | 26                                           |                | 68               | 13.6               |
| Formic Acid      | 0.34                    | 1.7               | 13               | 8                                            |                | 68               | 13.6               |
| CO <sub>2</sub>  | NA                      | 7.5               | 54               | 37                                           |                | 300              | 60                 |
| H <sub>2</sub>   | NA                      | 1.9               | NA               | NA                                           |                | 76               | 15.2               |

#: Selectivity among the organic products

**Table S6:** Product analysis of glycerol oxidation by using **dry air**.

| Product          | Concentration (M/g. 5h) | Yield (mmol/g.5h) | Selectivity (%)# | Selectivity with respect to no of Carbon (%) | Conversion (%) | TON (Au loading) | TOF (Au loading)/h |
|------------------|-------------------------|-------------------|------------------|----------------------------------------------|----------------|------------------|--------------------|
| Glycolaldehyde   | 0.49                    | 2.4               | 35               | 43                                           | 7              | 96               | 19.2               |
| Dihydroxyacetone | 0.19                    | 0.95              | 14               | 26                                           |                | 38               | 7.6                |
| Formic Acid      | 0.13                    | 0.65              | 10               | 6                                            |                | 5.2              | 1                  |
| CO <sub>2</sub>  | NA                      | 2.8               | 41               | 25                                           |                | 112              | 22.4               |
| H <sub>2</sub>   | NA                      | 23                | NA               | NA                                           |                | 920              | 184                |

#: Selectivity among the organic products

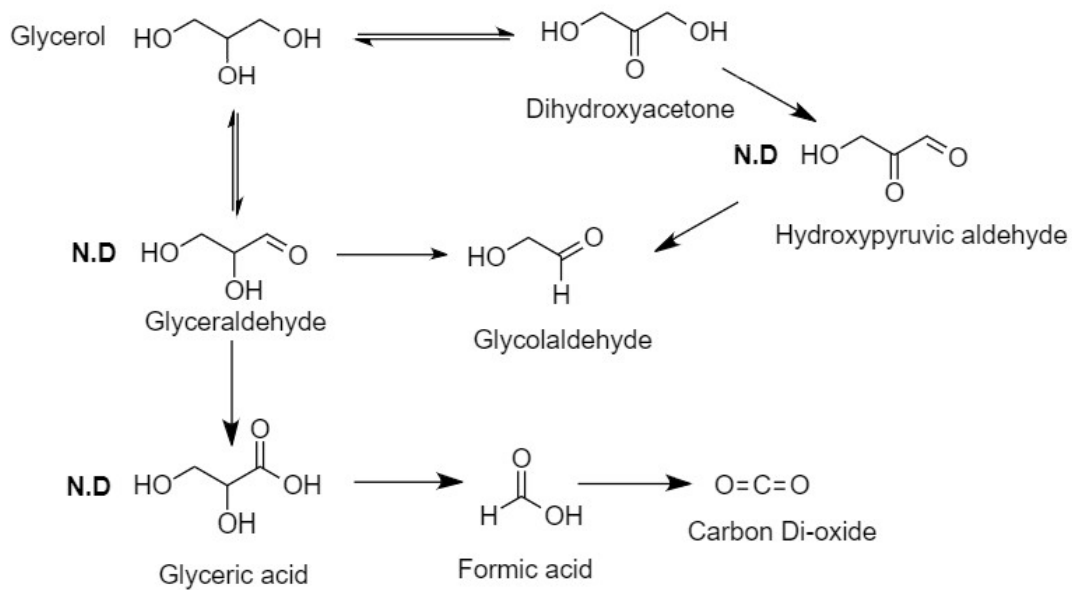

**N.D: Not Detected**

**Figure S7:** Plausible reaction pathway for glycerol oxidation to VAPs over Au@TiO<sub>2</sub> composites

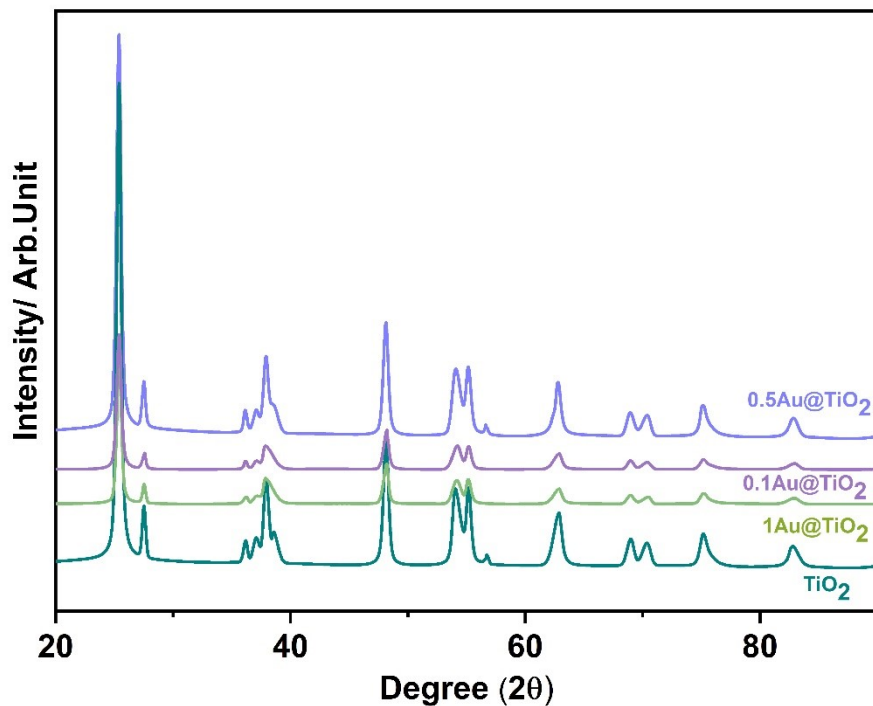

**Figure S8:** X-ray diffraction pattern of TiO<sub>2</sub> and xAu@TiO<sub>2</sub> (x = 0.1, 0.5 and 1). Same features are observed indicates with all of the catalysts underscore a possible fine-distribution of atom-like or very small size gold clusters. STEM results shown in Figure 5 fully support this conclusion.

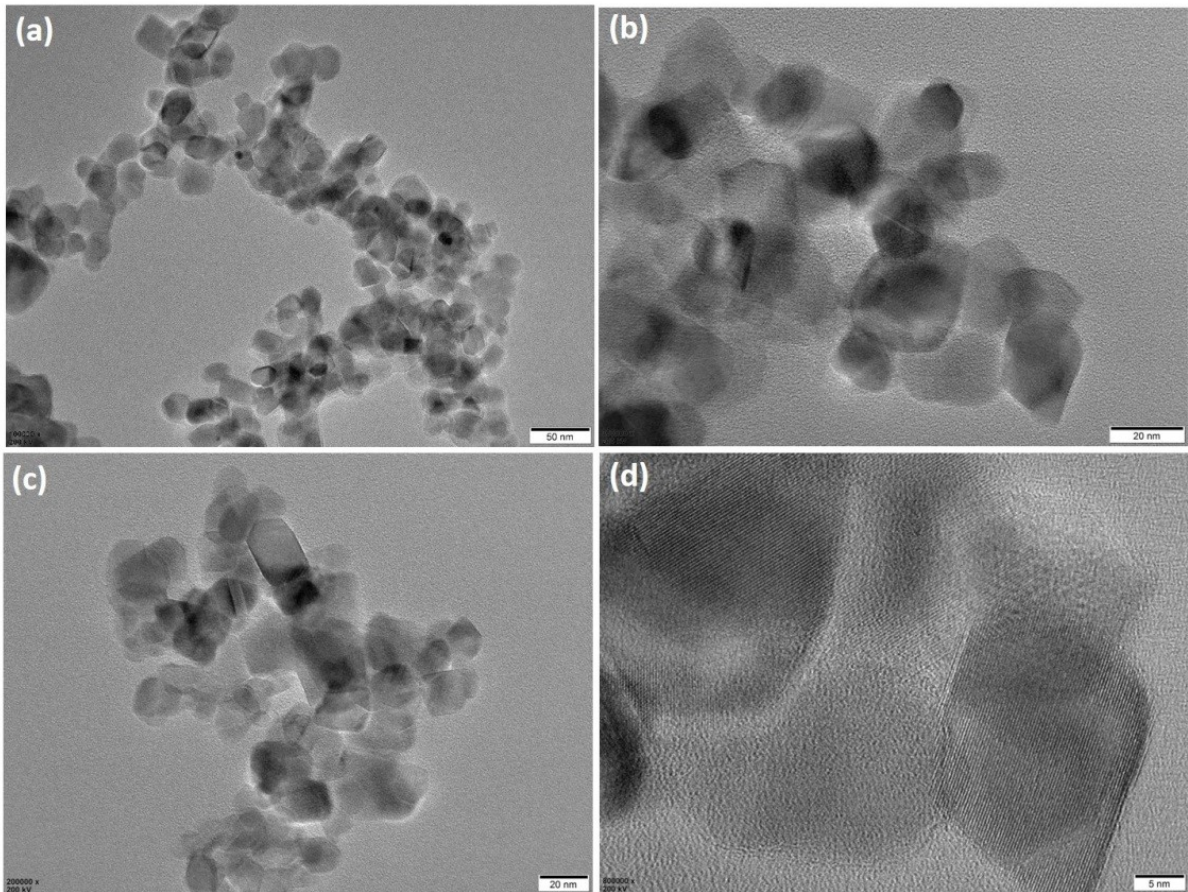

**Figure S9:** HRTEM images of  $0.5\text{Au}@\text{TiO}_2$ . No gold feature was observed in HRTEM indicates the size of gold to be atom or atom-like clusters.
